# Supplementary figures and images for: Neuronal origins of reduced accuracy and biases in economic choices under sequential offers
Source: eLife journal article supplement (doi:10.7554/elife.75910), 2022-04-13

### Chosen value cells

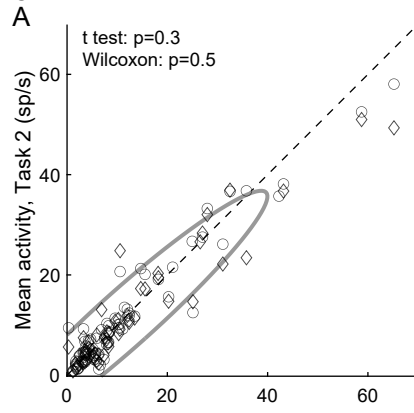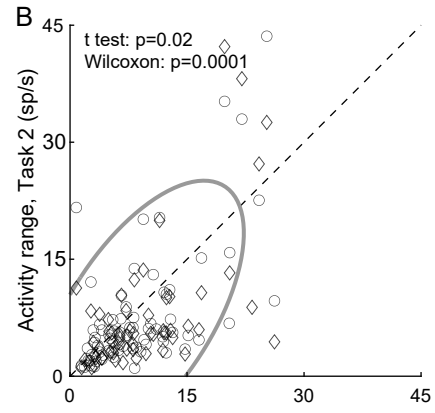

### Chosen juice cells

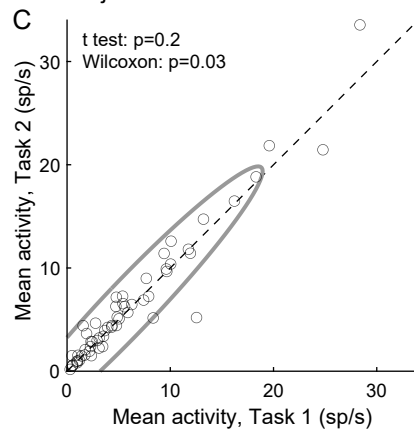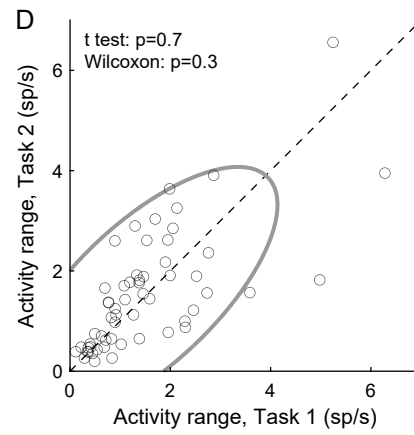

Supplement: supp [file elife_poa_e75910_Figure_4_figure_supplement_1.pdf › elife_poa_e75910_Figure_4_figure_supplement_1.pdf]

Offer value cells

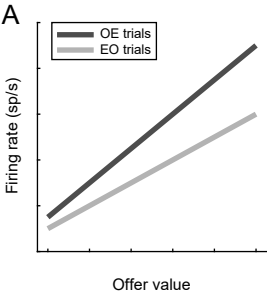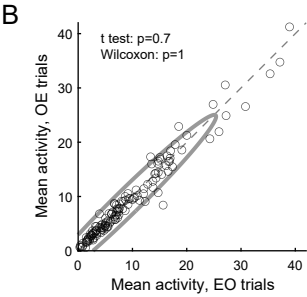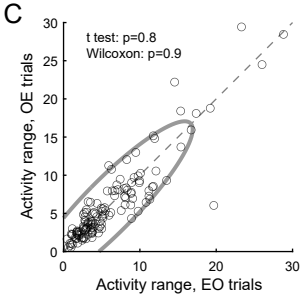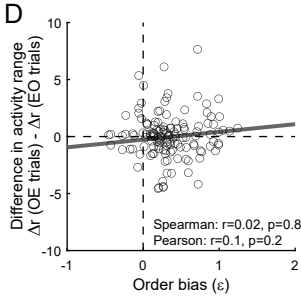

Supplement: supp [file elife_poa_e75910_Figure_5_figure_supplement_1.pdf › elife_poa_e75910_Figure_5_figure_supplement_1.pdf]

# Offer value A cells

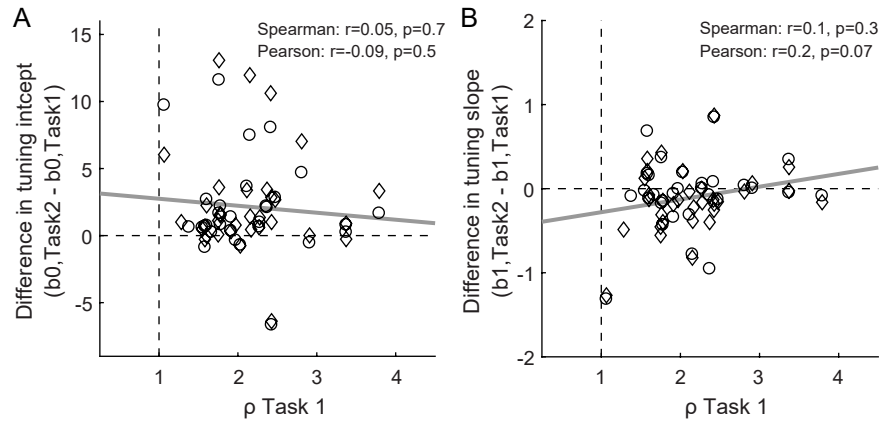

# Offer value B cells

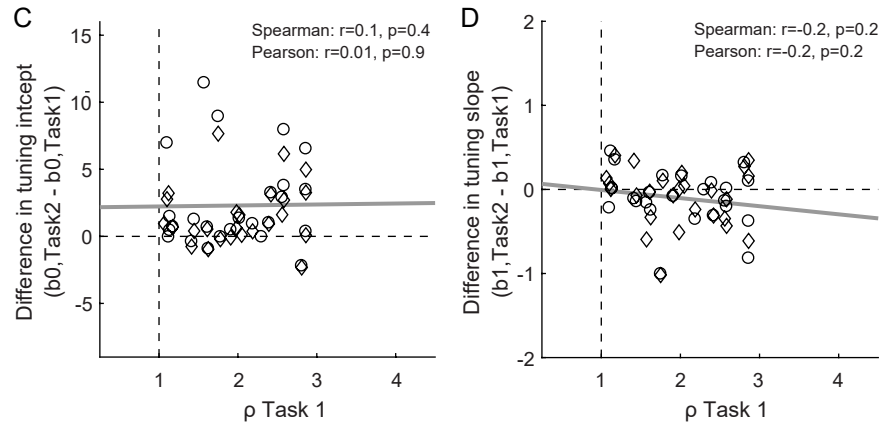

Supplement: supp [file elife_poa_e75910_Figure_7_figure_supplement_1.pdf › elife_poa_e75910_Figure_7_figure_supplement_1.pdf]
